# Supplementary material
Source: publisher site journal article supplement (https://www.dovepress.com/article/299478)
Supplement: Supplementary file 1 [file get_supplementary_file.php]

# Figure S1: Antimicrobial resistance genes in carbapenem-producing *K. pneumoniae* isolates.


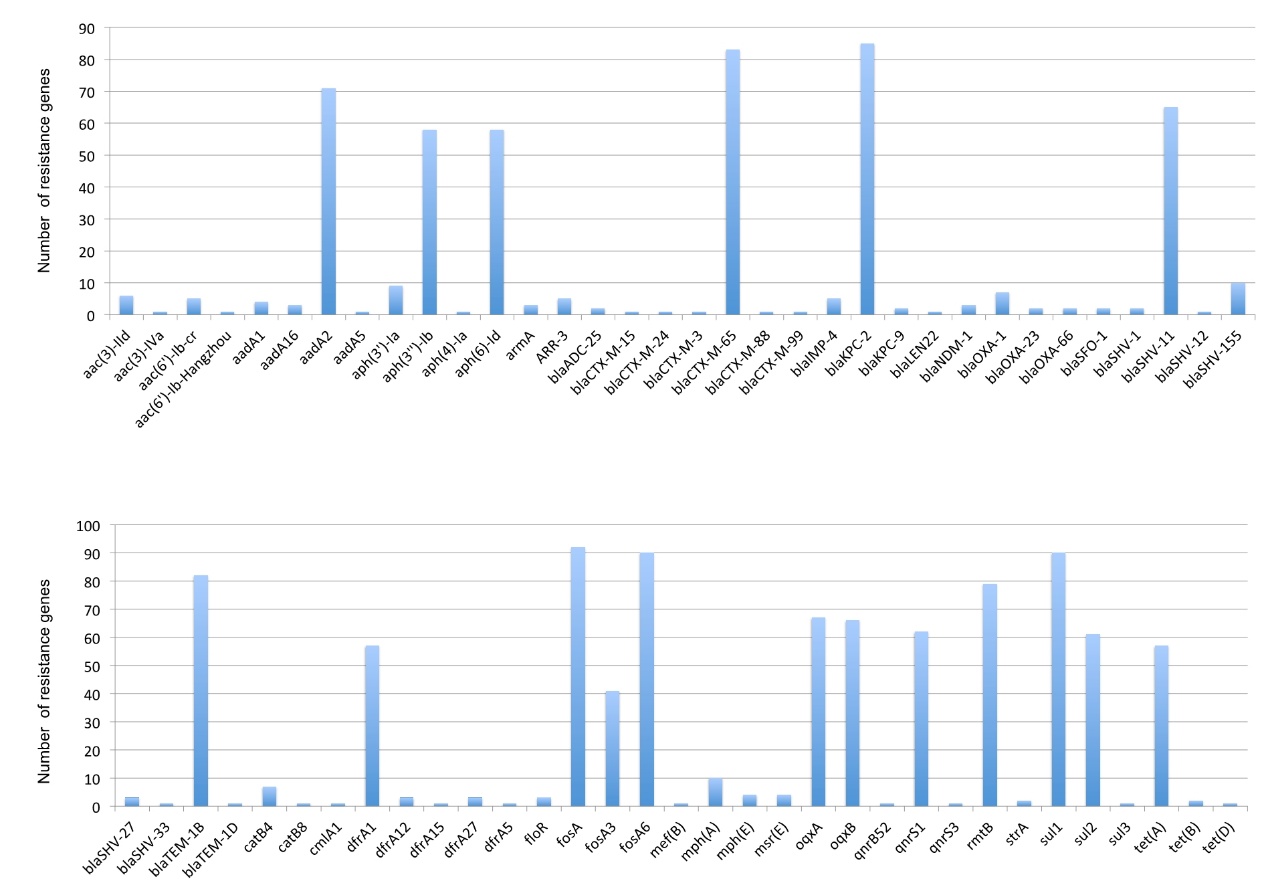


# Table S1. Amino acid substitution in a zone with high frequency of SNPs in the P2405-9’s core genome compared with other CT2405 isolates’.

| Gene | Codon position | Amino acid position | Product |
| --- | --- | --- | --- |
| DinI | 127 A＞G181 A＞G, 183 T＞A | 43 Thr＞Ala61 Ile＞Val | DNA damage-inducible protein I |
| LexA | 13 A＞C, 15 T＞C52A＞G | 5 Thr＞Pro18 Thr＞Ala | LexA repressor |
| YciE | 452 T＞A | 151 Ile＞Asn | Protein YciE |
| Smc | 427 A＞G499 A＞G580 T＞A697 T＞G708 T＞G869 T＞C1315 A＞C1398 G＞C1405 A＞T2018 A＞G2372 T＞C4134 T＞G4193 T＞C6296 A＞G11196 T＞G | 143 Lys＞Glu167 Thr＞Ala194 Ser＞Thr233 Ser＞Ala236 Phe＞Leu290 Ile＞Thr439 Met＞Leu466 Met＞Ile469 Ile＞Phe673 Asn＞Ser791 Val＞Ala1378 His＞Gln1398 Met＞Thr2099 Asn＞Ser 3732 Phe＞Leu | Chromosome partition protein Smc |
| RrrD | 23 C＞G, 24 T＞C86 T＞C118 T＞G, 119 C＞A166 G＞A334 G＞A347 C＞A362 G＞A433 A＞C | 8 Thr＞Ser29 Met＞Thr40 Ser＞Asp56 Ala＞Thr112 Gly＞Arg116 Thr＞Asn121 Arg＞His145 Lys＞Gln | Lysozyme RrrD |
